# Supplementary material for: Development and Optimization of a Silica Column-Based Extraction Protocol for Ancient DNA
Source: MDPI journal article supplement (doi:10.3390/genes13040687), 2022-04-13
Supplement: s1 [file s1]

## EQUIPMENT

1. Incubator capable of agitating the samples
2. Vortex
3. Centrifuge
4. Microcentrifuge
5. MinElute PCR Purification kit (Qiagen, cat no. 28004): contains Qiagen MinElute spin columns, PB binding buffer, PE washing buffer and EB elution buffer.
6. 30K MWCO Vivaspın filters (Sartorius).
7. Eppendorf 1.5 ml LoBind tubes
8. 2 ml (capless) collection tubes
9. 2 ml screw-cap tube (optional)
10. 200  $\mu$ l long-reach pipette tips

## REAGENTS

1. EDTA (0.5M)
2. Urea (1M)
3. Proteinase K (10  $\mu$ g/ $\mu$ L)
4. USER enzyme, 1,000 units/ml (New England Biolabs)

## PROCEDURE

*NOTE: this protocol is optimized for approximately 50 mg of bone/tooth powder. Bone powder is preferentially collected in 2 ml screw cap tubes that enable them to be rotated during incubation.*

Reagent preparation (hands-on time: less than 15 minutes per batch)

1. For each sample, prepare an extraction buffer mix as follows:
  - i. 630  $\mu$ L EDTA (0.5M, pH 8)
  - ii. 70  $\mu$ L UREA (1M)

Demineralization and DNA digestion (hands-on time: 30–60 minutes per batch)

2. Add 700  $\mu$ L of extraction buffer mix to each sample separately, and vortex thoroughly.
3. Add 15  $\mu$ L of Proteinase K (10  $\mu$ g/ $\mu$ L) to each sample separately, and vortex thoroughly.
4. Incubate the tubes under motion overnight (12–24h) at 55°C.

DNA purification (hands-on time: 1–2 hours per batch)

5. Pellet the bone powder by centrifugation for 5 minutes at 2,300 rpm.
6. Transfer the supernatant to a Vivaspın filter.

*NOTE: Avoid disturbing the bone pellet, as small bone particles can clog up the filter. It is advised to not transfer more than 700 uL of supernatant.*

*NOTE: Avoid spilling liquid on the rim of the Vivaspin filter. This may create a vacuum that results in the supernatant not flowing through.*

7. Centrifuge at 12,000 rpm until less than 120 uL supernatant is left  
*The flow-through times depend on the sample but will often range between 7 to 10 minutes. If more than 120 uL is left after 10 minutes, it is advised to repeat the centrifuge step for 5 minutes, until enough liquid has flown through.*

*NOTE: The opening of the Vivaspin filter lids should face the center of the centrifuge. This is essential to make sure that the centrifugal force works towards the filter.*

*NOTE: Do not centrifuge at higher speeds, as this can break the filter.*

8. Add 600 uL (or  $\geq 5X$ ) of PB binding buffer to 1.5 mL a LoBind tube
9. Transfer the concentrated liquid in the Vivaspin filter, using long-reach tips, to the LoBind tube with PB binding buffer and vortex thoroughly. Subsequently spin the mixture down.  
*NOTE: Avoid touching the filter of the Vivaspin column while pipetting the liquid.*
10. Transfer the sample + PB buffer mixture (max 720 uL) to a MinElute spin column and centrifuge for 1 minute at 13,000 rpm.
11. Discard the flow-through and transfer the column to a new collection tube.  
*NOTE: PB buffer contains a high concentration of guanidine hydrochloride and should thus be handled as hazardous waste.*
12. Apply 720 uL of PE washing buffer onto the column and centrifuge for 1 minute at 13,000 rpm.
13. Discard the flow-through and transfer the column to a new collection tube.
14. Centrifuge the column for 1 minute at 13,000 rpm.  
*This step is to make sure that any residual ethanol is removed from the MinElute column.*
15. Discard the flow-through and transfer the column to a 1.5 mL LoBind Eppendorf tube
  - i. Cut of the lids of the LoBind tube
  - ii. Leave the column to dry for ~5 minutes with open lid  
*This step is added to make sure that any residual ethanol evaporates from the*

*MinElute filter.*

16. Add 50 uL of EB Buffer to the column and leave for 1 minute.

*NOTE: The EB buffer can also be warmed to 37°C to increase elution efficiency.*

17. Centrifuge the column for 1 minute at 13,000 rpm.

18. Add another 50 uL of EB Buffer and leave for 1 minute.

19. Centrifuge the column for 1 minute at 13,000 rpm.

20. Transfer the DNA extract from the lid-less tube to a new 1.5 mL screw cap Eppendorf tube or LoBind tube.

Uracil treatment

21. Incubate 20 uL ancient DNA extract with 3 uL of USER enzyme for 3 hours at 37°C.

Stop the reaction by cooling the mixture to 4°C.

*Alternatively, if sequencing libraries are made following the protocol of Meyer and Kircher (2010), one can combine uracil treatment with the blunt-end repair step before adding T4 DNA polymerase.*
